# Supplementary material for: Superfast Gelation of Spider Silk-Based Artificial Silk Protein
Source: MDPI journal article supplement (doi:10.3390/gels10010069), 2024-01-17
Supplement: s1 [file s1]

## Superfast Gelation of Spider Silk-Based Artificial Silk Protein

Fan Wen<sup>1</sup>, Yu Wang<sup>1</sup>, Bowen Tu<sup>2</sup>, Lun Cui<sup>1,3,\*</sup>

1 CCZU-JITRI joint Bio-X Lab, School of Pharmacy & School of Biological and Food Engineering, Changzhou University, 213164, Changzhou, Jiangsu Province, China

2 Pathogenic Biological Laboratory, Changzhou Disease Control and Prevention Centre, Changzhou Medical Centre, Nanjing Medical University, 213000, Changzhou, Jiangsu Province, China

3 Biomaterials Lab, Changzhou AiRiBio Healthcare CO., LTD, 213164, Changzhou, Jiangsu Province, China

\*Corresponding Author(s), E-mail(s): luncui@cczu.edu.cn

Contributing authors, E-mail: Fan Wen: [wenfan25@outlook.com](mailto:wenfan25@outlook.com)

Yu Wang: [wyu30086@gmail.com](mailto:wyu30086@gmail.com)

Bowen Tu: [tbwchangzhou@163.com](mailto:tbwchangzhou@163.com)

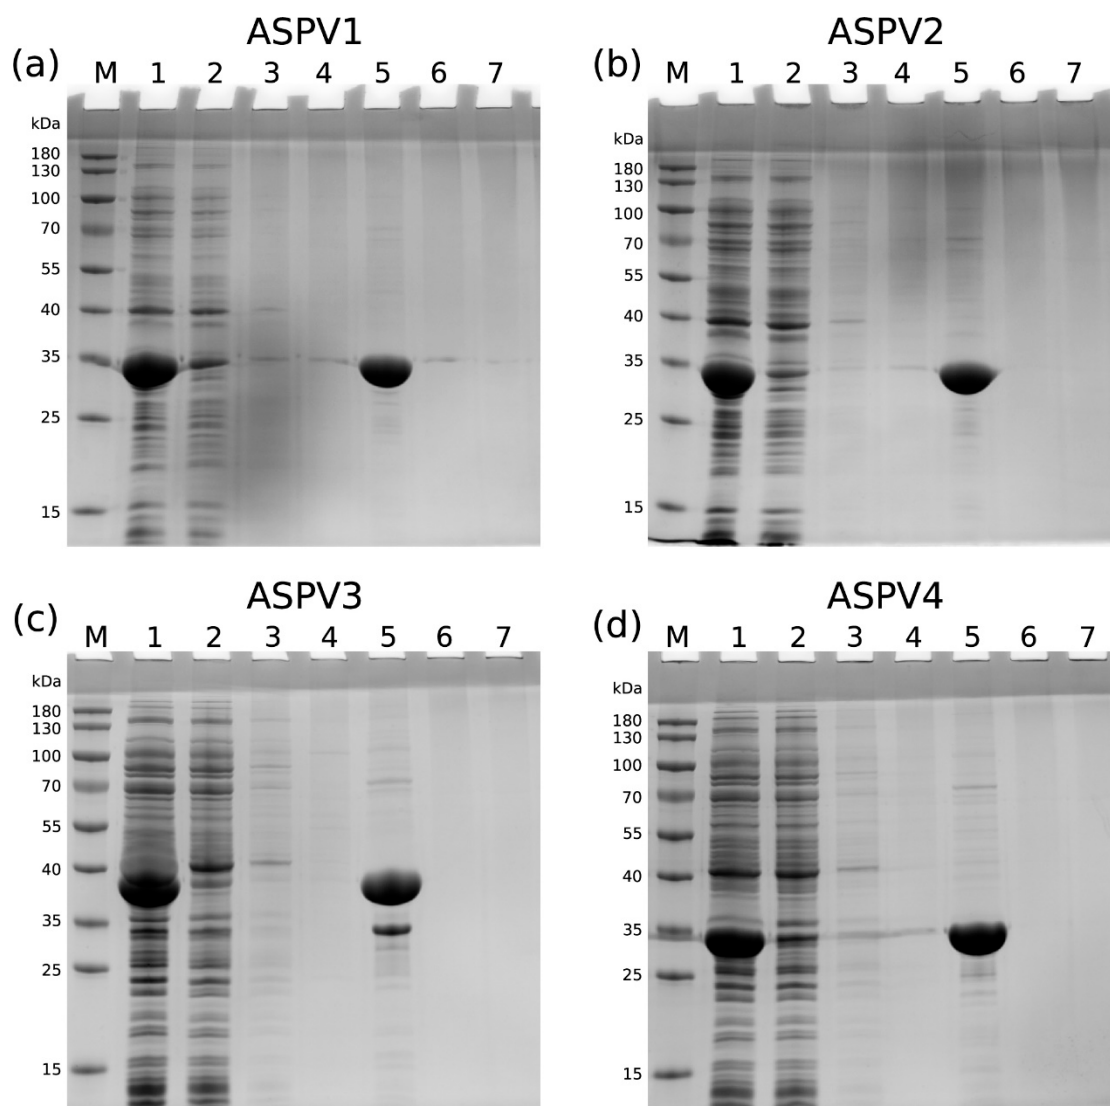

**Figure S1.** Analysis of protein purification stages for ASPV1, ASPV2, ASPV3, and ASPV4. SDS-PAGE was performed to assess the purification process of four different proteins designated as ASPV1 (a), ASPV2 (b), ASPV3 (c), and ASPV4 (d). Each panel represents a distinct protein purification profile. Lane M contains molecular weight markers with sizes indicated in kilodaltons (kDa). Lane 1 shows the initial cell lysate. Lane 2 contains the flow-through fraction from the binding buffer. Lanes 3 display the flow-through from the wash buffer. Lanes 4 to 7 represent successive elution fractions (Elute 1-4) with each elute volume being 5 ml, illustrating the proteins eluted during the purification process.

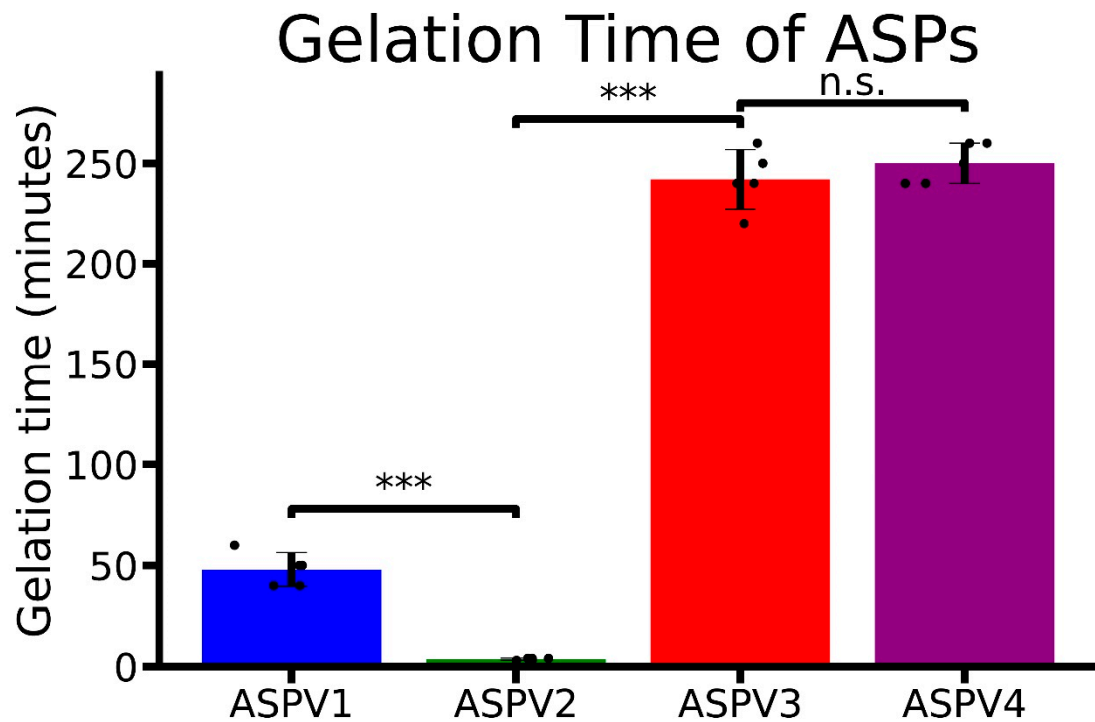

**Figure S2.** Gelation Time of ASP Proteins at 20 mg/ml Concentration. ASPV1 shows a significantly longer gelation time compared to ASPV2, indicated by the triple asterisks, denoting a p-value < 0.001. ASPV3 and ASPV4 have markedly increased gelation time compared to ASPV2, also indicated by triple asterisks. No significant difference (n.s.) in gelation time is observed between ASPV3 and ASPV4. Error bars represent standard deviation.

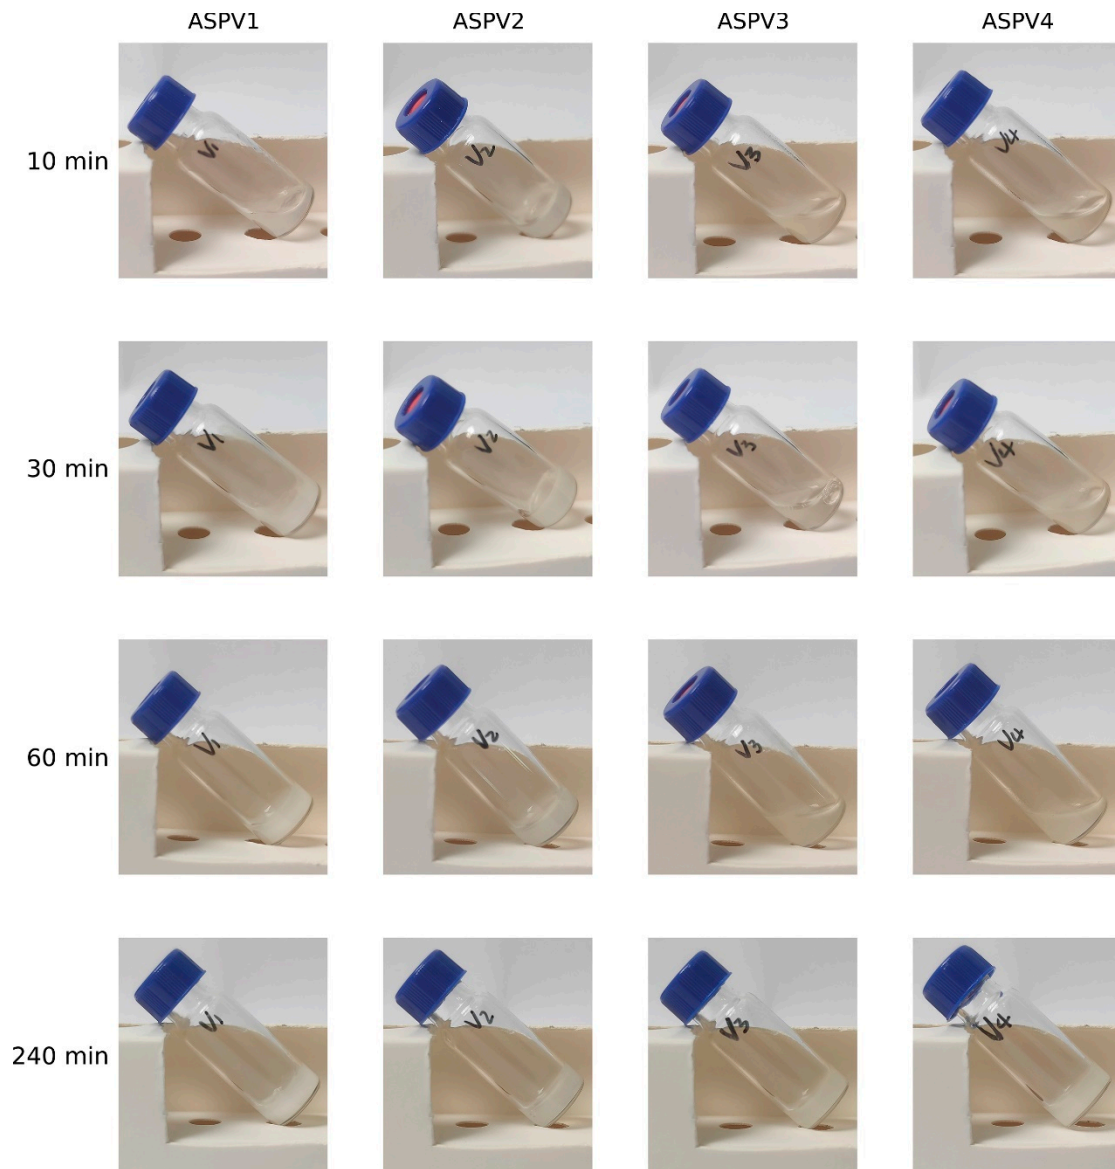

**Figure S3.** Visual Representation of Gelation Process for ASPs at Different Time Intervals. The series of images demonstrates the gelation of ASPV1, ASPV2, ASPV3, and ASPV4 proteins over time at a concentration of 20 mg/ml. Each row represents time points at 10, 30, 60, and 240 minutes post-initiation of the gelation process. The columns correspond to the different ASP proteins. At 10 minutes, solid hydrogel already formed for ASPV2. At 60 minutes, ASPV1 exhibits full gelation. At 240 minutes, complete gelation is observed for all ASPs.

# ASPV1

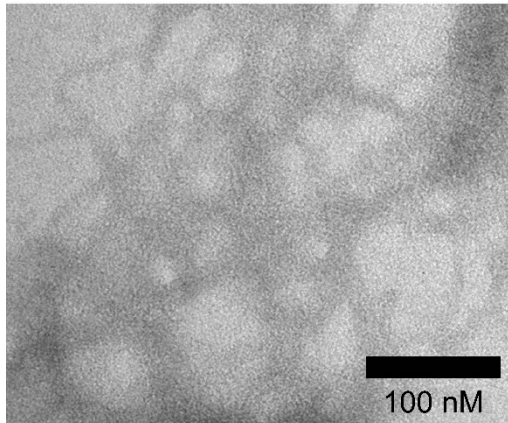

# ASPV2

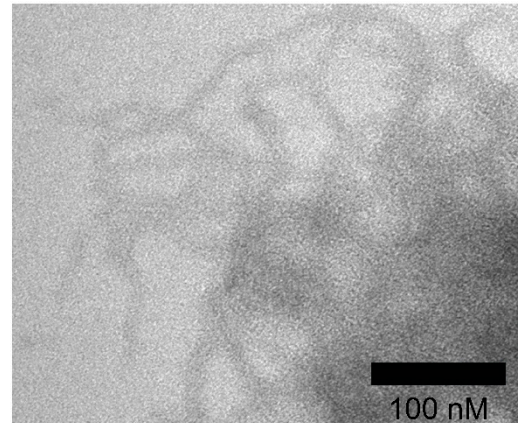

**Figure S4.** Transmission electron microscopy (TEM) images displaying the nanofibrillar structures of hydrogels formed by ASPV1 and ASPV2 (Samples were prepared without sonication).

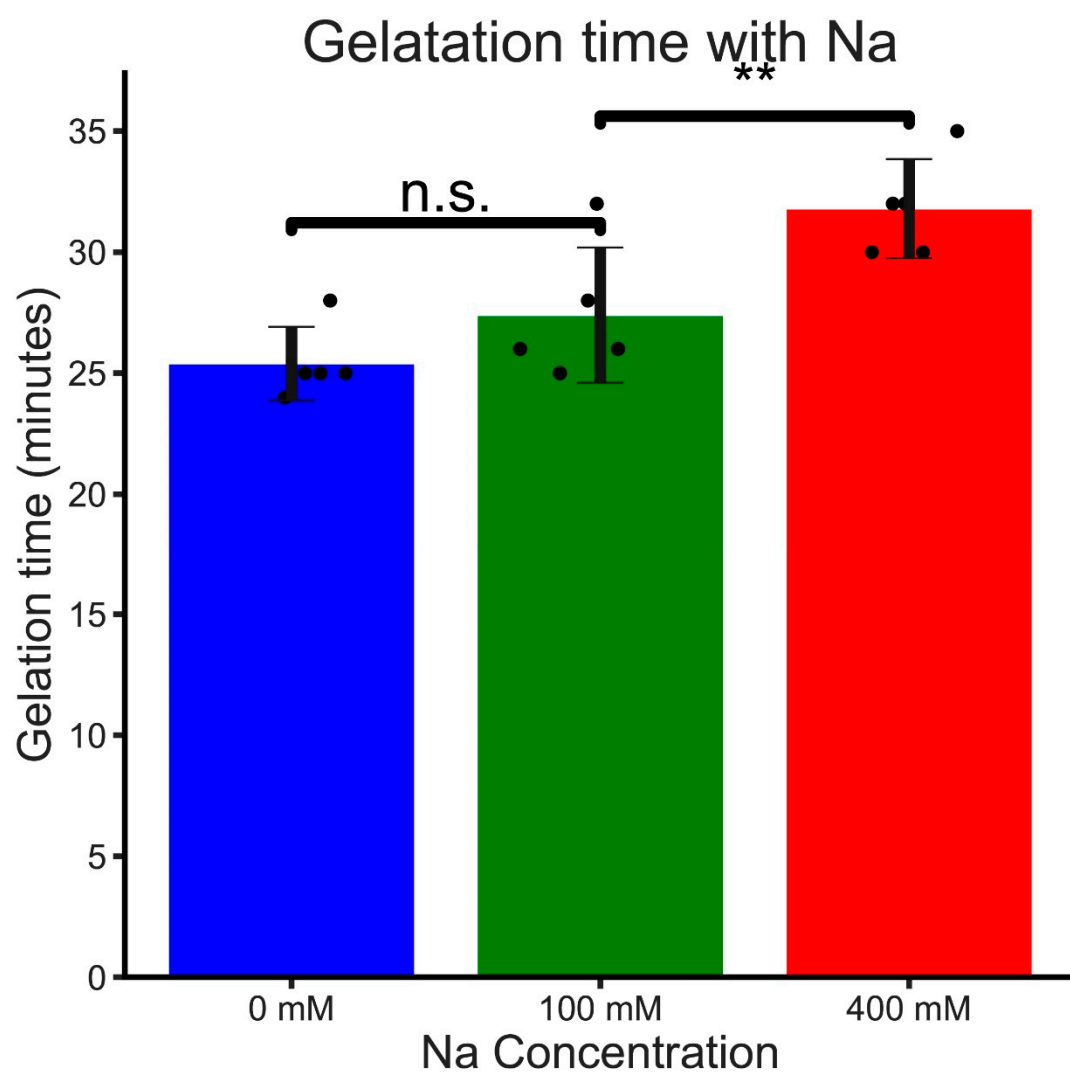

**Figure S5.** Impact of Sodium Concentration on Gelation Time. The bar for 0 mM Na shows the shortest gelation time. A non-significant difference (n.s.) is observed between 0 mM and 100 mM Na concentrations. However, a significant increase in gelation time is noted at 400 mM Na concentration, as indicated by double asterisks (\*\*), corresponding to a p-value < 0.05. Error bars indicate standard deviation.

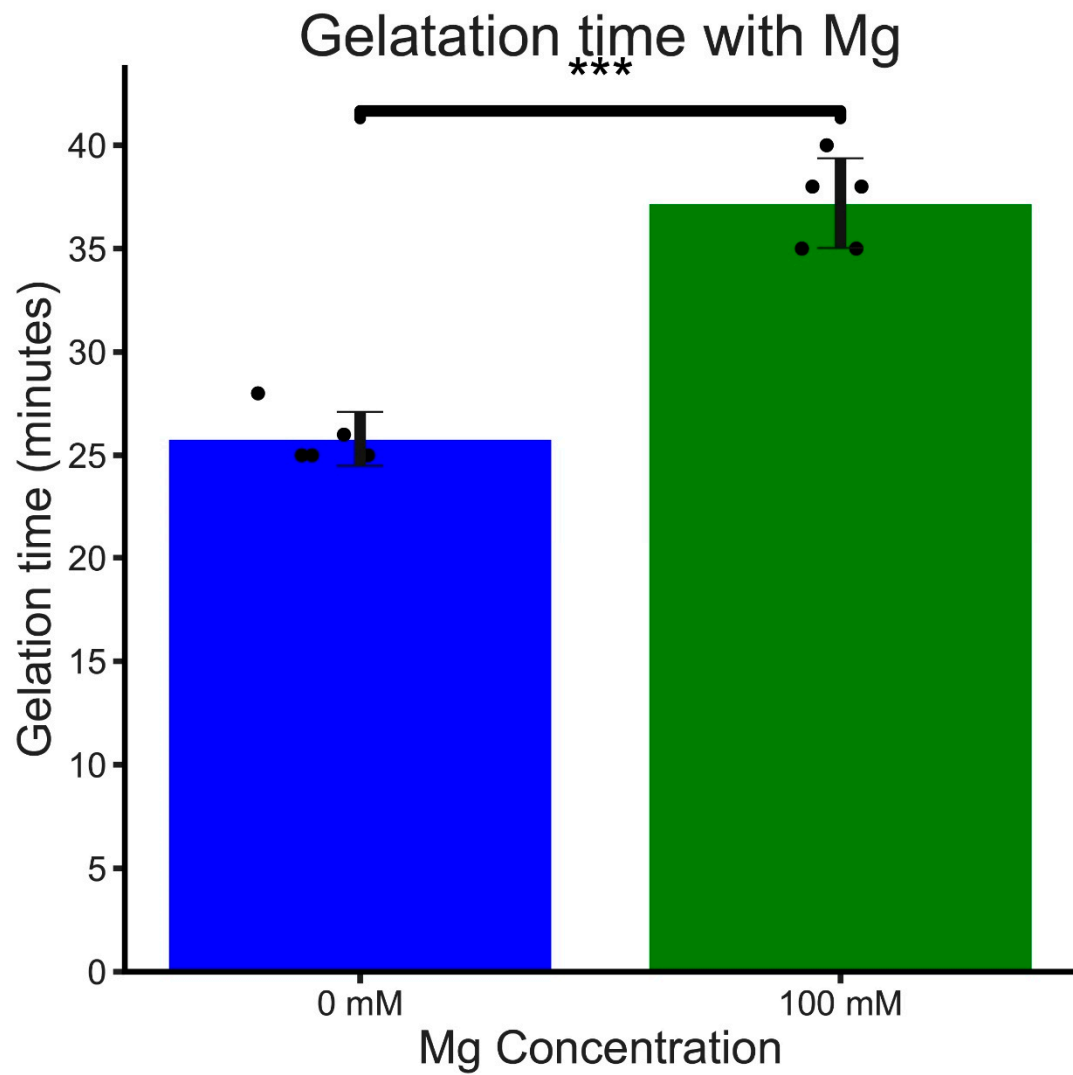

**Figure S6.** Influence of Magnesium Concentration on Gelation Time. The presence of 100 mM Mg significantly increases the gelation time compared to the absence of Mg, as shown by the green bar and denoted by the triple asterisks (\*\*\*), indicating a p-value < 0.001. Error bars represent the standard deviation.

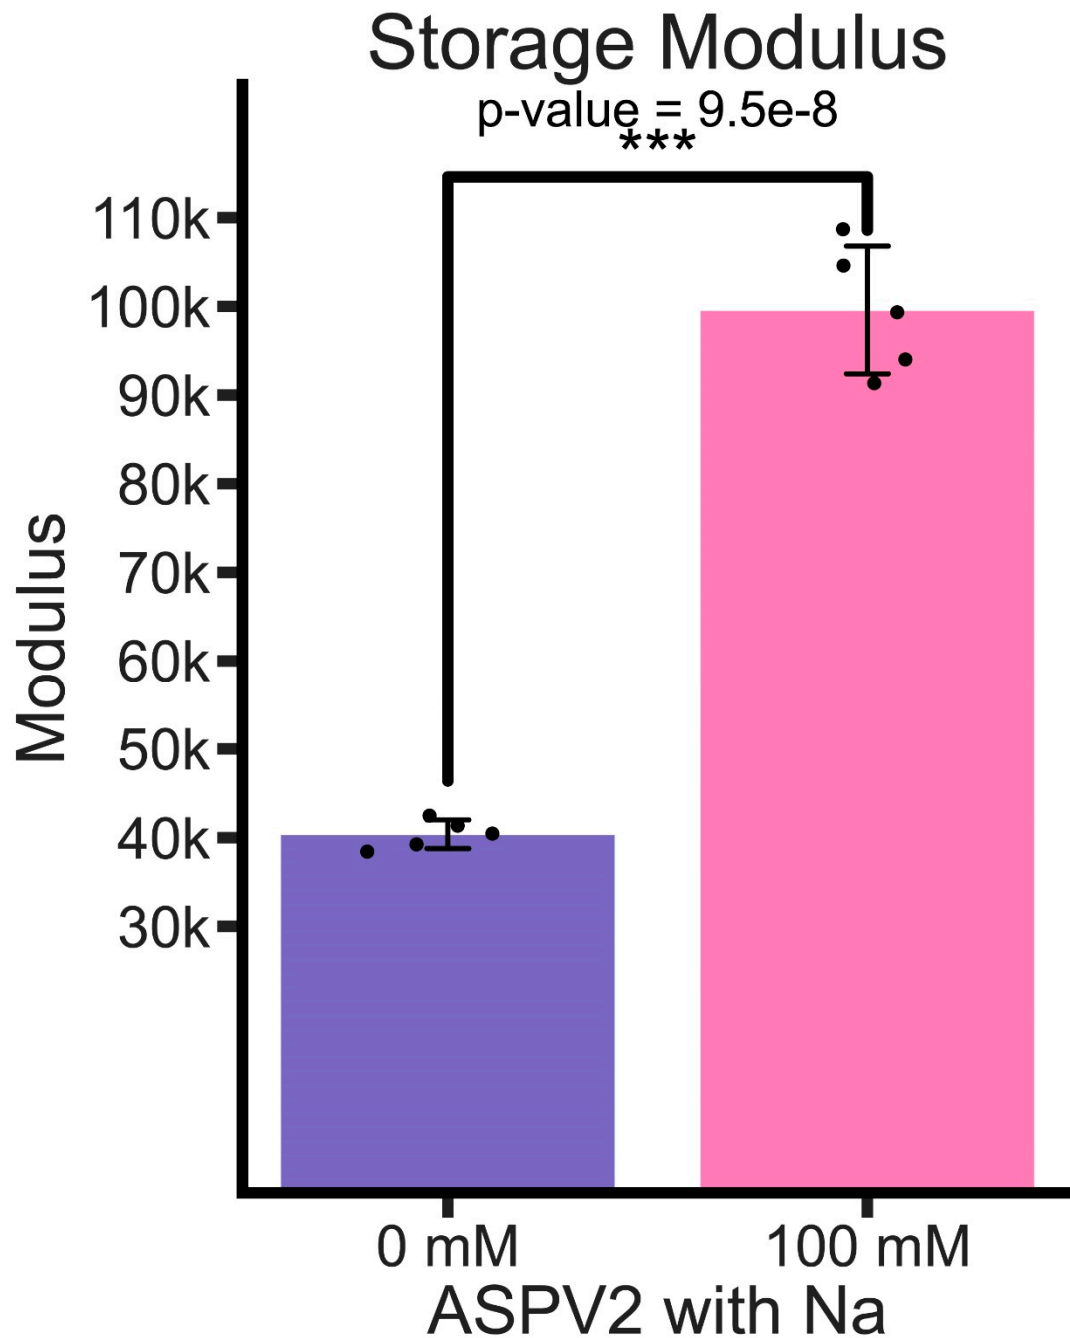

**Figure S7.** Effect of Sodium on the Storage Modulus of ASPV2. The left bar (purple) shows the storage modulus of ASPV2 without sodium (0 mM Na), and the right bar (pink) indicates the storage modulus with 100 mM sodium. Error bars depict the standard deviation, the statistical significance between the two conditions is denoted by asterisks (\*\*\*), with a p-value of  $9.5e-8$ .

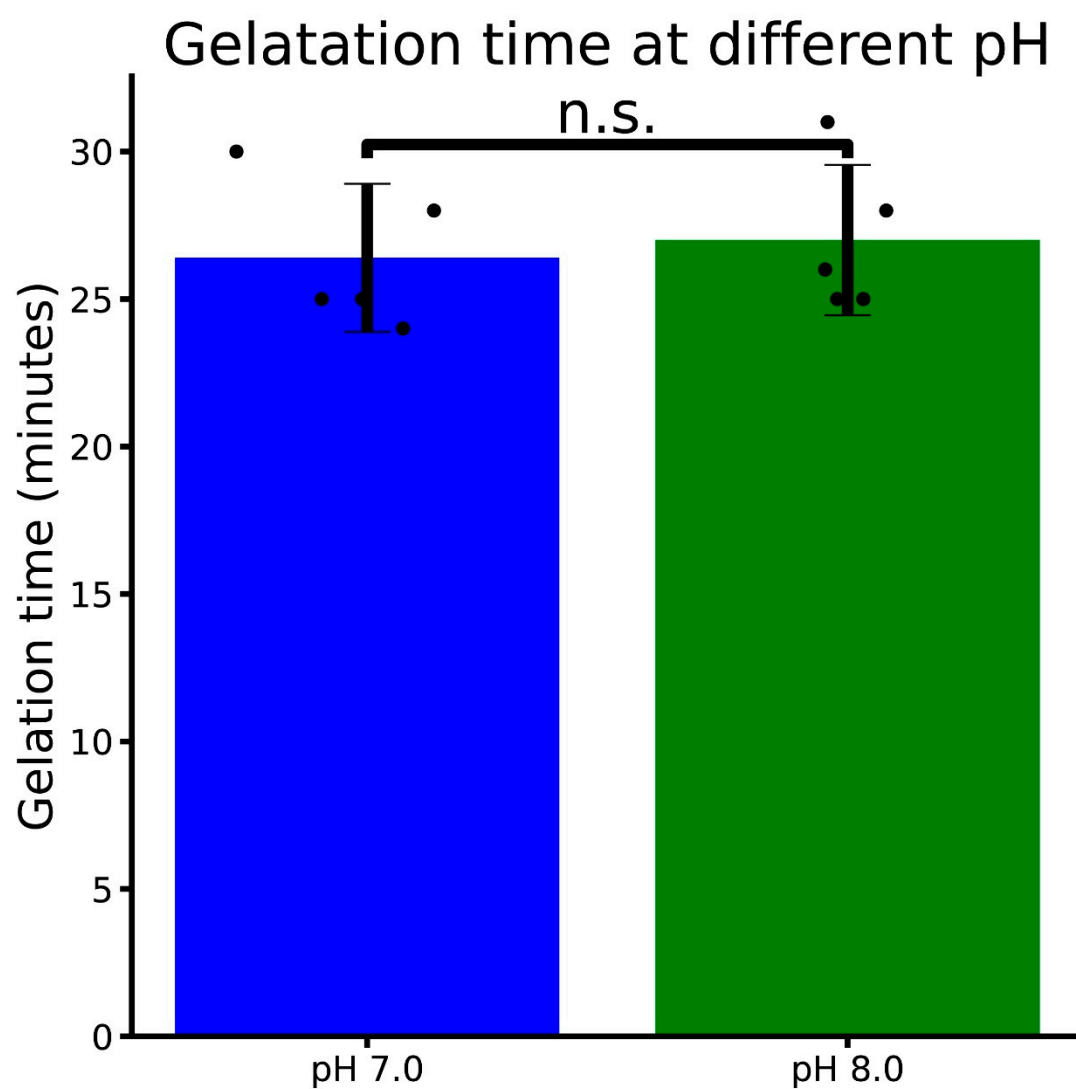

**Figure S8.** Gelation Time of Protein Solution at Different pH Levels. The chart reveals that the gelation time does not significantly change (n.s., not significant) with an increase in pH from 7.0 to 8.0. The error bars represent standard deviation. Error bars depict the standard deviation.

ASPV1

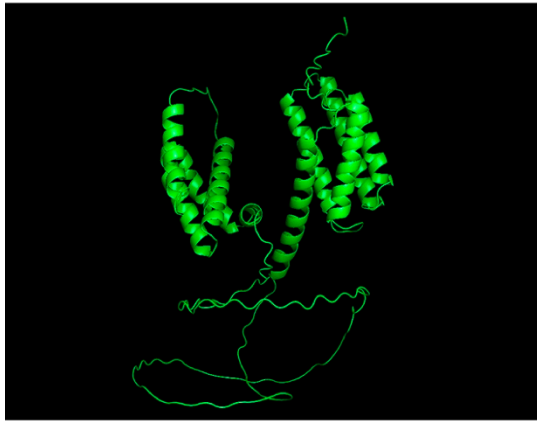

ASPV2

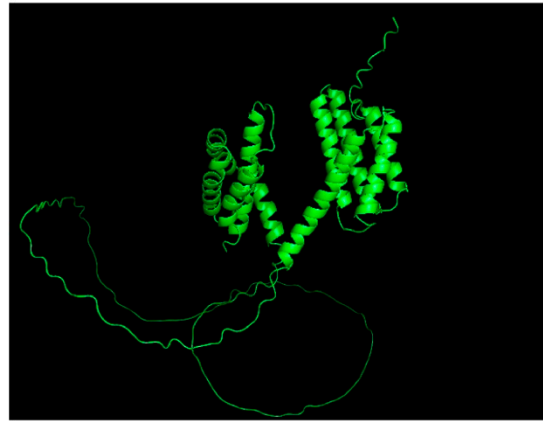

ASPV3

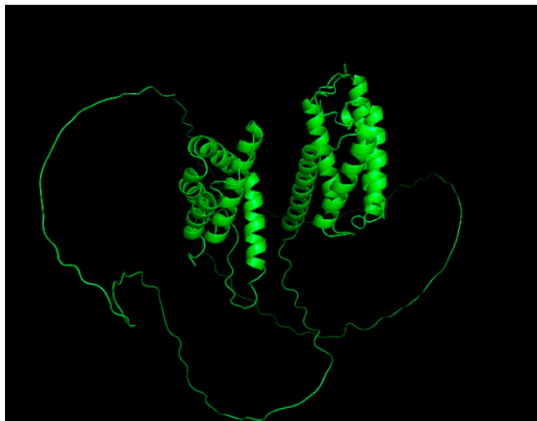

ASPV4

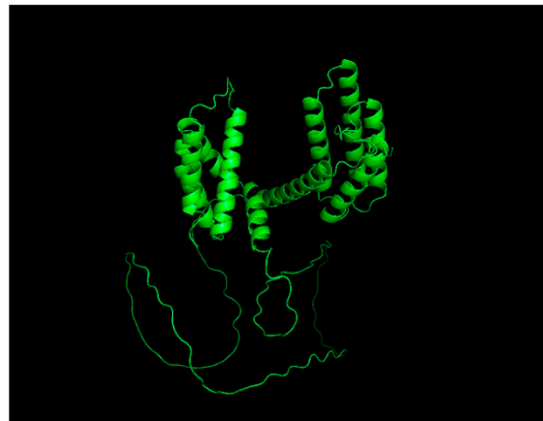

**Figure S9.** Predicted 3D Structures of ASPs by AlphaFold2. Each panel corresponds to a ASP, showing the intricate folds and coils characteristic of protein tertiary structures.

### Seq 1: pASPV1

GGGGAATTGTGAGCGGATAACAATTCCCCTCTAGAAATAATTTTGTTTAACTTTAAGAAGGAGAT  
ATACCATGCATCATCACCACCACCACCATTACATACCACTCCGTGGACCAATCCGGGTCT  
GGCGGAGAACTTCATGAACTCCTTTATGCAGGGCCTGAGCAGCATGCCGGGTTTCACCGCAAG  
CCAGCTGGACGACATGAGCACGATTGCGCAAAGCATGGTTCAGTCGATCCAGAGCTTGGCGGC  
CCAGGGTCGCACCTCCCCGAATAAGCTGCAGGCACTGAACATGGCGTTCGCCAGCTCCATGGC  
AGAGATCGCGGCGTCTGAAGAAGGTGGTGGTAGTTTGTCTACGAAAACCAGCTCTATCGCGTCT  
GCTATGAGCAACGCATTCCTGCAGACCACTGGTGTGGTGAACCAGCCATTTATCAATGAAATCA  
CCCAGCTCGTTAGCATGTTTGCACAAGCTGGCATGAATGATGTTAGCGCGGCTAGCCAGGGTGG  
GTTTTCCGGCCAAGGGCAAGGGGGGTTTGGTCCAGGCGCTGGGTCCAGCGCAGCTGCAGCAG  
CAGCAGCTGCCGCGGCTGCACGGCAAGGTGGGCAAGGCCAAGGGGGTTTTGGTCAGGGGGCA  
GGTGGCAACGCCGCGGCAGCAGCTGCAGCTGCCGCAGCTGCGGCCGCTGCACAACAAGGTGG  
GCAAGGGGGTTTTTCGGGGCGCGGCCAAGGCGGTTTCGGGCCGGGTGCCGGGAGCAGCACTA  
GTGTTACCAGCGGCGGCTACGGTTACGGCACCTCCGCGGCGGCTGGTGCGGGCGTCGCAGCG  
GGTAGCTATGCCGGCGCGGTTAATCGTCTGAGCTCAGCGGAGGCAGCGTCTCGTGTTCCTCCA  
ACATCGCCGCGATTGCCTCGGGCGGCGCAAGCGCTTTACCGTCTGTTATTAGCAACATTTATAG  
CGGCGTCTGTGGCATCGGGCGTGAGCTCTAACGAGGCCCTGATTCAGGCACTTTTGGAACTGCT  
GTCTGCCTTGGTGCACGTGCTGAGCTCAGCTAGTATCGGTAACGTGAGCTCCGTGGGTGTGAC  
AGCACGCTGAATGTAGTTCAGGATTCCGTGGGCCAATATGTTGGTAAAAAGTAAGGACTCGTCT  
ACTAGCGCAGCTTAATTAACCTAGGCTGCTGCCACCGCTGAGCAATAACTAGCATAACCCCTTG  
GGGCTCTAAACGGGTCTTGAGGGGTTTTTGTGAAAGGAGGAATAATCCGATTGGCGAA  
TGGGACGCGCCCTGTAGCGGCGCATTAAAGCGCGGCGGGTGTGGTGGTTACGCGCAGCGTGAC  
CGCTACACTTGCCAGCGCCCTAGCGCCCGCTCCTTCGCTTCTTCCCTTCTTCTCGCCACGTT  
CGCCGGCTTTCCCGTCAAGCTCTAAATCGGGGGCTCCCTTTAGGGTTCCGATTTAGTGCTTTAC  
GGCACCTCGACCCCAAAAACTTGATTAGGGTGATGGTTCACGTAGTGGGCCATCGCCCTGATA  
GACGGTTTTTCGCCCTTTGACGTTGGAGTCCACGTTCTTTAATAGTGGACTCTTGTTCCAACTGG  
AACAACTCAACCCTATCTCGGTCTATTCTTTGATTTATAAGGGATTTTGCCGATTTGGCCCTA  
TTGGTTAAAAAATGAGCTGATTTAACAAAAATTTAACGCGAATTTTAACAAAAATTAACGTTTA  
CAATTTCTGGCGGCACGATGGCATGAGATTATCAAAAAGGATCTTCACCTAGATCCTTTTAAATT  
AAAAATGAAGTTTTAAATCAATCTAAAGTATATATGAGTAACTTGGTCTGACAGTTACCAATGC  
TTAATCAGTGAGGCACCTATCTCAGCGATCTGTCTATTCGTTTCATCCATAGTTGCCTGACTCCCC  
GTCGTGTAGATAACTACGATACGGGAGGGCTTACCATCTGGCCCCAGTGCTGCAATGATACCGC  
GAGACCCACGCTCACC GGCTCCAGATTTATCAGCAATAAACCAGCCAGCCGGAAGGGCCGAGC  
GCAGAAGTGGTCCTGCAACTTTATCCGCCTCCATCCAGTCTATTAATTGTTGCCGGAAGCTAG  
AGTAAGTAGTTCGCCAGTTAATAGTTTGCGCAACGTTGTTGCCATTGCTACAGGCATCGTGGTGT  
CACGCTCGTCGTTTGGTATGGCTTCATTCAGCTCCGGTCCCAACGATCAAGGCGAGTTACATG  
ATCCCCCATGTTGTGCAAAAAAGCGTTAGCTCCTTCGGTCTCCGATCGTTGTCAGAAGTAAG  
TTGGCCGCAGTGTTATCACTCATGGTTATGGCAGCACTGCATAATTCTCTTACTGTCATGCCATC  
CGTAAGATGCTTTTCTGTGACTGGTGAGTACTCAACCAAGTCATTCTGAGAATAGTGTATGCGGC  
GACCGAGTTGCTCTTGCCGGCGTCAATACGGGATAATACCGCGCCACATAGCAGAACTTTAAA  
AGTGCTCATATTGGAAAACGTTCTTCGGGGCGAAAACTCTCAAGGATCTTACCGCTGTTGAGA  
TCCAGTTCGATGTAACCCACTCGTGCACCCAACTGATCTTCAGCATCTTTTACTTTACCAGCGTT  
TCTGGGTGAGCAAAAAACAGGAAGGCAAAATGCCGCAAAAAAGGGAATAAGGGCGACACGGAA  
ATGTTGAATACTCATACTCTTCCTTTTCAATCATGATTGAAGCATTTATCAGGGTTATTGTCTCAT

GAGCGGATACATATTTGAATGTATTTAGAAAAATAAACAAATAGGTCATGACCAAAATCCCTTA  
ACGTGAGTTTTCTGTTCCACTGAGCGTCAGACCCCGTAGAAAAGATCAAAGGATCTTCTTGAGAT  
CCTTTTTTCTGCGCGTAATCTGCTGCTTGCAACAAAAAACACCGCTACCAGCGGTGGTTTG  
TTTGCCGGATCAAGAGCTACCAACTCTTTTTCCGAAGGTAAGTGGCTTCAGCAGAGCGCAGATA  
CCAAATACTGTCCTTCTAGTGTAGCCGTAGTTAGGCCACCACTTCAAGAACTCTGTAGCACCGC  
CTACATACCTCGCTCTGCTAATCCTGTTACCAAGTGGCTGCTGCCAGTGGCGATAAGTCGTGTCTT  
ACCGGGTTGGACTCAAGACGATAGTTACCGGATAAGGCGCAGCGGTGCGGCTGAACGGGGGG  
TTCGTGCACACAGCCCAGCTTGGAGCGAACGACCTACACCGAACTGAGATACCTACAGCGTGA  
GCTATGAGAAAGCGCCACGCTTCCCGAAGGGAGAAAGGCGGACAGGTATCCGGTAAGCGGCA  
GGGTCGGAACAGGAGAGCGCACGAGGGGAGCTTCCAGGGGAAACGCCTGGTATCTTTATAGTC  
CTGTGCGGTTTTGCCACCTCTGACTTGAGCGTCGATTTTTGTGATGCTCGTCAGGGGGGCGGAG  
CCTATGAAAAACGCCAGCAACGCGGCCCTTTTTACGGTTCCTGGCCTTTTGCTGGCCTTTTGCTC  
ACATGTTCTTTCTGCGTTATCCCCTGATTCTGTGGATAACCGTATTACCGCCTTTGAGTGAGCTG  
ATACCGCTCGCCGACGCCGAACGACCGAGCGCAGCGAGTCAGTGAGCGAGGAAGCGGAAGA  
GCGCCTGATGCGGTATTTTCTCCTTACGCATCTGTGCGGTATTTACACCGCATATATGGTGCAC  
TCTCAGTACAATCTGCTCTGATGCCGCATAGTTAAGCCAGTATACACTCCGCTATCGCTACGTGA  
CTGGGTCATGGCTGCGCCCCGACACCCGCCAACACCCGCTGACGCGCCCTGACGGGCTTGTCT  
GCTCCCGGCATCCGCTTACAGACAAGCTGTGACCGTCTCCGGGAGCTGCATGTGTCAGAGGTTT  
TCACCGTCATCACCGAAACGCGCGAGGCAGCTGCGGTAAAGCTCATCAGCGTGGTCGTGAAGC  
GATTCACAGATGTCTGCCTGTTTCATCCGCGTCCAGCTCGTTGAGTTTCTCCAGAAGCGTTAATGT  
CTGGCTTCTGATAAAGCGGGCCATGTTAAGGGCGGTTTTTCTGTTTGGTCACTGATGCCTCCG  
TGTAAGGGGGATTTCTGTTTCATGGGGGTAATGATACCGATGAAACGAGAGAGGATGCTCACGA  
TACGGGTTACTGATGATGAACATGCCCGGTTACTGGAACGTTGTGAGGGTAAACAACTGGCGGT  
ATGGATGCGGCGGGACCAGAGAAAAATCACTCAGGGTCAATGCCAGCGCTTCGTTAATACAGA  
TGTAGGTGTTCCACAGGGTAGCCAGCAGCATCCTGCGATGCAGATCCGGAACATAATGGTGCA  
GGGCGCTGACTTCCGCGTTTCCAGACTTTACGAAACACGGAAACCGAAGACCATTATGTTGTT  
GCTCAGGTGCGAGACGTTTTGCAGCAGCAGTCGCTTCACGTTGCTCGCGTATCGGTGATTCAAT  
CTGCTAACAGTAAGGCAACCCCGCCAGCCTAGCCGGGTCCTCAACGACAGGAGCACGATCAT  
GCTAGTCATGCCCCGCGCCACCGGAAGGAGCTGACTGGGTGAAGGCTCTCAAGGGCATCGG  
TCGAGATCCCGGTGCCTAATGAGTGAGCTAACTTACATTAATTGCGTTGCGCTCACTGCCCCGCTT  
TCCAGTCGGGAAACCTGTCGTGCCAGCTGCATTAATGAATCGGCCAACGCGCGGGGAGAGGCG  
GTTTGCGTATTGGGCGCCAGGGTGGTTTTTCTTTTACCAGTGAGACGGGCAACAGCTGATTGC  
CCTTACCGCCTGGCCCTGAGAGAGTTGCAGCAAGCGGTCCACGCTGGTTTGCCCCAGCAGGC  
GAAAATCCTGTTTGATGGTGGTTAACGGCGGGATATAACATGAGCTGTCTTCGGTATCGTCGTAT  
CCCACTACCGAGATGTCCGCACCAACGCGCAGCCCGGACTCGGTAATGGCGCGCATTGCGCCC  
AGCGCCATCTGATCGTTGGCAACCAGCATCGCAGTGGGAACGATGCCCTCATTACGATTTGCA  
TGGTTTGTTGAAAACCGGACATGGCACTCCAGTCGCCTTCCCGTTCGCTATCGGCTGAATTTGA  
TTGCGAGTGAGATATTTATGCCAGCCAGCCAGACGCGAGCGCCGAGACAGAACTTAATGGG  
CCCGCTAACAGCGCGATTTGCTGGTGACCCAATGCGACCAGATGCTCCACGCCAGTCGCGTA  
CCGTCTTCATGGGAGAAAATAATACTGTTGATGGGTGTCTGGTCAGAGACATCAAGAAATAACG  
CCGGAACATTAGTGACGGCAGCTTCCACAGCAATGGCATCCTGGTCATCCAGCGGATAGTTAAT  
GATCAGCCCACTGACGCGTTGCGCGAGAAGATTGTGCACCGCCGCTTTACAGGCTTCGACGCC  
GCTTCGTTCTACCATCGACACCACCGCTGGCACCCAGTTGATCGGCGCGAGATTTAATCGCC  
GCGACAATTTGCGACGGCGCGTGCAGGGCCAGACTGGAGGTGGCAACGCCAATCAGCAACGA

CTGTTTGCCCGCCAGTTGTTGTGCCACGCGGTTGGGAATGTAATTCAGCTCCGCCATCGCCGCTT  
CCACTTTTTCCCGCGTTTTTCGCAGAAACGTGGCTGGCCTGGTTCAACACGCGGGAAACGGTCTG  
ATAAGAGACACCGGCATACTCTGCGACATCGTATAACGTTACTGGTTTCACATTCACCACCCTG  
AATTGACTCTCTTCCGGGCGCTATCATGCCATACCGCGAAAGGTTTTGCGCCATTCGATGGTGTC  
CGGGATCTCGACGCTCTCCCTTATGCGACTCCTGCATTAGGAAGCAGCCCAGTAGTAGGTTGAG  
GCCGTTGAGCACCGCCGCCGCAAGGAATGGTGCATGCAAGGAGATGGCGCCCAACAGTCCCC  
CGGCCACGGGGCCTGCCACCATAACCCACGCCGAAACAAGCGCTCATGAGCCCGAAGTGGCGA  
GCCCATCTTCCCCATCGGTGATGTCGGCGATATAGGCGCCAGCAACCGCACCTGTGGCGCCG  
GTGATGCCGGCCACGATGCGTCCGGCGTAGAGGATCGAGATCGATCTCGATCCCGCGAAATTA  
ATACGACTCACTATA

## Seq 2: pASPV2

GGGGAATTGTGAGCGGATAACAATTCCCCTCTAGAAATAATTTTGTTTAACTTTAAGAAGGA  
GATATACCATGCATCATCACCACCACCACCATTACATACCACTCCGTGGACCAATCC  
GGGTCTGGCGGAGAACTTCATGAACTCCTTTATGCAGGGCCTGAGCAGCATGCCGGGTTTC  
ACCGCAAGCCAGCTGGACGACATGAGCACGATTGCGCAAAGCATGGTTCAGTCGATCCAG  
AGCTTGGCGGCCAGGGTCGCACCTCCCCGAATAAGCTGCAGGCACTGAACATGGCGTTC  
GCCAGCTCCATGGCAGAGATCGCGGCGTCTGAAGAAGGTGGTGGTAGTTTGTCTACGAAA  
ACCAGCTCTATCGCGTCTGCTATGAGCAACGCATTCTGCAGACCACTGGTGTGGTGAACC  
AGCCATTTATCAATGAAATCACCCAGCTCGTTAGCATGTTTGCACAAGCTGGCATGAATGAT  
GTTAGCGCGGCTAGCGGTTATGGGGGTCTGGGTGGCCAAGGGGCGGGACAAGGTGCCGG  
TGCAGCTGCAGCGGCCGCCGGTGGCGCAGGTCAAGGGTACGGCGGGTTAGGTGGGCAAG  
GGGCAGGGGCAGCAGCCGCTGCGGCGGGTGGGGCTGGTCAAGGTGGCTATGGTGGTTTG  
GGTGGTCAAGGTGCCGGTCAAGGTGGCGGTGCGGCCGCAGCAGCGGCAGGCGGCGCAG  
GTCAGGGCGGTTACGGTGGATTGGGCGGTCAAGGAGCAGGTCAAGGTGCAGGTGCAGCC  
GCAGCCGCAGCAGGTGGTGCAGGTCAAGGCACTAGTGTTACCAGCGGCGGCTACGGTTAC  
GGCACCTCCGCGGCGGCTGGTGCGGGCGTGCAGCGGGTAGCTATGCCGGCGCGGTTAAT  
CGTCTGAGCTCAGCGGAGGCAGCGTCTCGTGTTTCTCCAACATCGCCGCGATTGCCTCGG  
GCGGCGCAAGCGCTTTACCGTCTGTTATTAGCAACATTTATAGCGGCGTCTGGCATCGGG  
CGTGAGCTCTAACGAGGCCCTGATTCAGGCACTTTTGAACTGCTGTCTGCCTTGGTGAC  
GTGCTGAGCTCAGCTAGTATCGGTAACGTGAGCTCCGTGGGTGTCGACAGCACGCTGAAT  
GTAGTTCAGGATTCCGTGGGCAATATGTTGGTAAAAAGTAAGGACTCGTCTACTAGCGCA  
GCTTAATTAACCTAGGCTGCTGCCACCGCTGAGCAATAACTAGCATAACCCCTTGGGGCCT  
CTAAACGGGTCTTGAGGGGTTTTTGTCTGAAAGGAGGAACTATATCCGGATTGGCGAATGG  
GACGCGCCCTGTAGCGGCGCATTAAAGCGCGGCGGGTGTGGTGGTTACGCGCAGCGTGACC  
GCTACACTTGCCAGCGCCCTAGCGCCCGCTCCTTTCGCTTCTTCCCTTCCTTCTCGCCAC  
GTTGCGCGGCTTTCCCGTCAAGCTCTAAATCGGGGGCTCCCTTTAGGGTCCGATTTAGTG  
CTTTACGGGCACCTCGACCCCAAAAACTTGATTAGGGTGATGGTTCACGTAGTGGGCCATC  
GCCCTGATAGACGGTTTTTCGCCCTTTGACGTTGGAGTCCACGTTCTTTAATAGTGGACTCTT  
GTTCCAACTGGAACAACACTCAACCCTATCTCGGTCTATTCTTTTGATTTATAAGGGATTTT  
GCCGATTTGCGCCTATTGGTTAAAAAATGAGCTGATTTAACAAAAATTTAACGCGAATTTTA  
ACAAAATATTAACGTTTACAATTTCTGGCGGCACGATGGCATGAGATTATCAAAAAGGATCT  
TCACCTAGATCCTTTTAAATTA AAAATGAAGTTTTAAATCAATCTAAAGTATATATGAGTAAA  
CTTGGTCTGACAGTTACCAATGCTTAATCAGTGAGGCACCTATCTCAGCGATCTGTCTATTT  
CGTTCATCCATAGTTGCCTGACTCCCCGTCGTGTAGATAACTACGATACGGGAGGGCTTAC  
CATCTGGCCCCAGTGCTGCAATGATACCGCGAGACCCACGCTCACCGGCTCCAGATTTATC  
AGCAATAAACCAGCCAGCCGGAAGGGCCGAGCGCAGAAGTGGTCCTGCAACTTTATCCGC  
CTCCATCCAGTCTATTAATTGTTGCCGGGAAGCTAGAGTAAGTAGTTCGCCAGTTAATAGTT  
TGCGCAACGTTGTTGCCATTGCTACAGGCATCGTGGTGTACGCTCGTCGTTTGGTATGGCT  
TCATTCAGCTCCGGTTCCCAACGATCAAGGCGAGTTACATGATCCCCCATGTTGTGCAAAA  
AAGCGGTTAGCTCCTTCGGTCCCTCCGATCGTTGTCAGAAGTAAGTTGGCCGCAGTGTTATC  
ACTCATGGTTATGGCAGCACTGCATAATTCTCTTACTGTGTCATGCCATCCGTAAGATGCTTTTC  
TGTGACTGGTGAGTACTCAACCAAGTCATTCTGAGAATAGTGTATGCGGCGACCGAGTTGC  
TCTTGCCCGGCGTCAATACGGGATAATACCGCGCCACATAGCAGAACTTTAAAAAGTGCTCA  
TCATTGAAAACGTTCTTCGGGGCGAAAACCTCTCAAGGATCTTACCGCTGTTGAGATCCAG

TTCGATGTAACCCACTCGTGCACCCAACTGATCTTCAGCATCTTTTACTTTACACAGCGTTTC  
TGGGTGAGCAAAAACAGGAAGGCCAAAATGCCGCAAAAAGGGAATAAGGGCGACACGGA  
AATGTTGAATACTCATACTCTTCCTTTTTCAATCATGATTGAAGCATTTATCAGGGTTATTGTC  
TCATGAGCGGATACATATTTGAATGTATTTAGAAAAATAAACAAATAGGTCATGACCAAAAT  
CCCTTAACGTGAGTTTTCGTTCCACTGAGCGTCAGACCCCGTAGAAAAGATCAAAGGATCT  
TCTTGAGATCCTTTTTTCTGCGCGTAATCTGCTGCTTGCAAACAAAAAAACCACCGCTACC  
AGCGGTGTTTGTGTTGCCGGATCAAGAGCTACCAACTCTTTTTCCGAAGGTAAGTGGCTTCA  
GCAGAGCGCAGATACCAAATACTGTCCTTCTAGTGTAGCCGTAGTTAGGCCACCACTTCAA  
GAACTCTGTAGCACCGCCTACATACCTCGCTCTGCTAATCCTGTTACCAGTGGCTGCTGCCA  
GTGGCGATAAGTCGTGTCTTACCGGGTTGGACTCAAGACGATAGTTACCGGATAAGGCGC  
AGCGGTGCGGGCTGAACGGGGGGTTCGTGCACACAGCCCAGCTTGGAGCGAACGACCTAC  
ACCGAACTGAGATACCTACAGCGTGAGCTATGAGAAAGCGCCACGCTTCCCGAAGGGAGA  
AAGGCGGACAGGTATCCGGTAAGCGGCAGGGTCGGAACAGGAGAGCGCACGAGGGAGC  
TTCCAGGGGGAAACGCCTGGTATCTTTATAGTCCTGTGCGGGTTTCGCCACCTCTGACTTGAG  
CGTCGATTTTTGTGATGCTCGTCAGGGGGGCGGAGCCTATGGAAAAACGCCAGCAACGCG  
GCCTTTTACGGTTCCTGGCCTTTTGCTGGCCTTTTGCTCACATGTTCTTTCCTGCGTTATCCC  
CTGATTCTGTGGATAACCGTATTACCGCCTTTGAGTGAGCTGATACCGCTCGCCGCAGCCG  
AACGACCGAGCGCAGCGAGTCAGTGAGCGAGGAAGCGGAAGAGCGCCTGATGCGGTATT  
TTCTCCTTACGCATCTGTGCGGTATTTACACCGCATATATGGTGCACTCTCAGTACAATCTG  
CTCTGATGCCGCATAGTTAAGCCAGTATACACTCCGCTATCGCTACGTGACTGGGTCATGG  
CTGCGCCCCGACACCCGCCAACACCCGCTGACGCGCCCTGACGGGCTTGTCTGCTCCCGG  
CATCCGCTTACAGACAAGCTGTGACCGTCTCCGGGAGCTGCATGTGTCAGAGGTTTTACC  
GTCATACCGAAACGCGCGAGGCAGCTGCGGTAAAGCTCATCAGCGTGGTCGTGAAGCGA  
TTCACAGATGTCTGCCTGTTTCATCCGCGTCCAGCTCGTTGAGTTTCTCCAGAAGCGTTAATG  
TCTGGCTTCTGATAAAGCGGGCCATGTTAAGGGCGGTTTTTCTGTTTGGTCACTGATGCC  
TCCGTGTAAGGGGGATTCTGTTTCATGGGGTAATGATACCGATGAAACGAGAGAGGATG  
CTCACGATACGGGTTACTGATGATGAACATGCCCGGTTACTGGAACGTTGTGAGGGTAAAC  
AACTGGCGGTATGGATGCGGCGGGACCAGAGAAAAATCACTCAGGGTCAATGCCAGCGCT  
TCGTTAATACAGATGTAGGTGTTCCACAGGGTAGCCAGCAGCATCCTGCGATGCAGATCCG  
GAACATAATGGTGCAGGGCGCTGACTTCCGCGTTTCCAGACTTTACGAAACACGGAAACC  
GAAGACCATTTCATGTTGTTGCTCAGGTGCGCAGACGTTTTGCAGCAGCAGTCGTTACGTTG  
GCTCGCGTATCGGTGATTTCATTCTGCTAACCAGTAAGGCAACCCCGCCAGCCTAGCCGGGT  
CCTCAACGACAGGAGCACGATCATGCTAGTCATGCCCCGCGCCACCGGAAGGAGCTGAC  
TGGGTTGAAGGCTCTCAAGGGCATCGGTGAGATCCCGGTGCCTAATGAGTGAGCTAACTT  
ACATTAATTGCGTTGCGCTCACTGCCCGCTTTCAGTCGGGAAACCTGTGCTGCCAGCTGC  
ATTAATGAATCGGCCAACGCGCGGGGAGAGGCGGTTTGCGTATTGGGCGCCAGGGTGGTT  
TTTTTTTTACCAAGTGAGACGGGCAACAGCTGATTGCCCTTACCGCCTGGCCCTGAGAGA  
GTTGCAGCAAGCGGTCCACGCTGTTTTGCCCGAGCAGGCGAAAATCCTGTTTGATGGTGGT  
TAACGGCGGGATATAACATGAGCTGTCTTCGGTATCGTCGTATCCCACTACCGAGATGTCC  
GCACCAACGCGCAGCCCGGACTCGGTAAATGGCGCGCATTGCGCCAGCGCCATCTGATCG  
TTGGCAACCAGCATCGCAGTGGAACGATGCCCTCATTACGATTTGCATGGTTTGTTGAA  
AACGGGACATGGCACTCCAGTCGCCTTCCCGTTCCGCTATCGGCTGAATTTGATTGCGAGT  
GAGATATTTATGCCAGCCAGCCAGACGCGAGACGCGCCGAGACAGAACTTAATGGGCCCCG  
TAACAGCGCGATTTGCTGGTGACCCAATGCGACCAGATGCTCCACGCCCAGTCGCGTACC

GTCTTCATGGGAGAAAATAATACTGTTGATGGGTGTCTGGTCAGAGACATCAAGAAATAAC  
GCCGGAACATTAGTGCAGGCAGCTTCCACAGCAATGGCATCCTGGTCATCCAGCGGATAG  
TTAATGATCAGCCCACTGACGCGTTGCGCGAGAAGATTGTGCACCGCCGCTTTACAGGCTT  
CGACGCCGCTTCGTTCTACCATCGACACCACCACGCTGGCACCCAGTTGATCGGCGCGAG  
ATTTAATCGCCGCGACAATTTGCGACGGCGCGTGCAGGGCCAGACTGGAGGTGGCAACGC  
CAATCAGCAACGACTGTTTGCCCGCCAGTTGTTGTGCCACGCGGTTGGGAATGTAATTCAG  
CTCCGCCATCGCCGCTTCCACTTTTTCCCGCGTTTTCGCAGAAACGTGGCTGGCCTGGTTCA  
CCACGCGGGAAACGGTCTGATAAGAGACACCGGCATACTCTGCGACATCGTATAACGTTA  
CTGGTTTCACATTCACCACCCTGAATTGACTCTCTCCGGGCGCTATCATGCCATACCGCGA  
AAGGTTTTGCGCCATTCGATGGTGTCCGGGATCTCGACGCTCTCCCTTATGCGACTCCTGCA  
TTAGGAAGCAGCCCAGTAGTAGGTTGAGGCCGTTGAGCACCGCCGCCGCAAGGAATGGTG  
CATGCAAGGAGATGGCGCCCAACAGTCCCCCGGCCACGGGGCCTGCCACCATACCCACG  
CCGAAACAAGCGCTCATGAGCCCGAAGTGGCGAGCCCGATCTTCCCATCGGTGATGTCG  
GCGATATAGGCGCCAGCAACCGCACCTGTGGCGCCGGTGATGCCGGCCACGATGCGTCCG  
GCGTAGAGGATCGAGATCGATCTCGATCCCGCGAAATTAATACGACTCACTATA

### Seq 3: pASPV3

GGGGAATTGTGAGCGGATAACAATTCCCCTCTAGAAATAATTTTGTTTAACTTTAAGAAGGA  
GATATACCATGCATCATCACCACCACCACCATTACATACCACTCCGTGGACCAATCC  
GGGTCTGGCGGAGAACTTCATGAACTCCTTTATGCAGGGCCTGAGCAGCATGCCGGGTTTC  
ACCGCAAGCCAGCTGGACGACATGAGCACGATTGCGCAAAGCATGGTTCAGTCGATCCAG  
AGCTTGGCGGGCCAGGGTCGCACCTCCCCGAATAAGCTGCAGGCACTGAACATGGCGTTC  
GCCAGCTCCATGGCAGAGATCGCGGCGTCTGAAGAAGGTGGTGGTAGTTTGTCTACGAAA  
ACCAGCTCTATCGCGTCTGCTATGAGCAACGCATTCTGCAGACCACTGGTGTGGTGAACC  
AGCCATTTATCAATGAAATCACCCAGCTCGTTAGCATGTTTGCACAAGCTGGCATGAATGAT  
GTTAGCGCGGCTAGCTATGGTCCGTGAGGCCCGGGGAGCGCCGCAGCGGCAGCCGCCGC  
AGCAGGTGCAGGACCTGGAGGCTATGGCCCGGGTCAACAAGGTCCTGGCCAGCAAGGCC  
CAGGGGGTTACGGGCCTTCTGGTCCGGGGAGTGCAGCAGCTGCTGCGGCAGCCGCCGGG  
GCCGGTCTGGTGGCTACGGTCCTGGTCAACAAGGTCCAGGTCAGCAAGGCCCTGGGCAA  
CAGGGGCCGGGGGGCTATGGCCCTTCAGGGCCGGGGTCCGCGGCTGCTGCCGCTGCAGC  
CGCCGGTGCCGGTCCAGGTGGTTATGGTCCGGGCCAACAGGGGCCAGGACAACAGGGTC  
CAGGACAACAAGGTCCGGGTCAACAGGGTCCGGGCGGCTATGGTCCGTCCGGTCCAGGTT  
CAGCCGCAGCTGCTGCAGCAGCCGCTGGTGCAGGTCCTGGTGGCTATGGGCGGGGCCAG  
CAAGGGCCAGGGCAACAAGGGCCTGGGGGCACTAGTGTTACCAGCGGCGGCTACGGTTA  
CGGCACCTCCGCGGCGGCTGGTGCGGGCGTCGCAGCGGGTAGCTATGCCGGCGCGGTTA  
ATCGTCTGAGCTCAGCGGAGGCAGCGTCTCGTGTTTCTCCAACATCGCCGCGATTGCCTC  
GGGCGGCGCAAGCGCTTTACCGTCTGTTATTAGCAACATTTATAGCGGCGTCGTGGCATCG  
GGCGTGAGCTCTAACGAGGCCCTGATTCAGGCACTTTTGAACTGCTGTCTGCCTTGGTGC  
ACGTGCTGAGCTCAGCTAGTATCGGTAACGTGAGCTCCGTGGGTGTCGACAGCACGCTGA  
ATGTAGTTCAGGATTCCGTGGGCCAATATGTTGGTAAAAAGTAAGGACTCGTCTACTAGCG  
CAGCTTAATTAACCTAGGCTGCTGCCACCGCTGAGCAATAACTAGCATAACCCCTTGGGGC  
CTCTAACGGGTCTTGAGGGGTTTTTGTCTGAAAGGAGGAACTATATCCGGATTGGCGAAT  
GGGACGCGCCCTGTAGCGGCGCATTAAAGCGGCGGGGTGTGGTGGTTACGCGCAGCGTG  
ACCGCTACACTTGCCAGCGCCCTAGCGCCCGCTCCTTTCGCTTCTTCCCTTCTTCTCGCC  
ACGTTGCGCGGCTTTCCCGTCAAGCTCTAAATCGGGGGCTCCCTTTAGGGTTCCGATTTAG  
TGCTTTACGGCACCTCGACCCCAAAAACTTGATTAGGGTGATGGTTCACGTAGTGGGCCA  
TCGCCCTGATAGACGGTTTTTCGCCCTTGACGTTGGAGTCCACGTTCTTTAATAGTGGACT  
CTTGTTCCAACTGGAACAACACTCAACCCTATCTCGGTCTATTCTTTGATTTATAAGGGAT  
TTTGCCGATTTGGCCTATTGGTTAAAAAATGAGCTGATTTAACAAAAATTTAACGCGAATT  
TTAACAAAATATTAACGTTTACAATTTCTGGCGGCACGATGGCATGAGATTATCAAAAAGG  
ATCTTCACCTAGATCCTTTTAAATTAAAAAATGAAGTTTTTAAATCAATCTAAAGTATATGAG  
TAAACTTGGTCTGACAGTTACCAATGCTTAATCAGTGAGGCACCTATCTCAGCGATCTGTCT  
ATTTGTTTCATCCATAGTTGCCTGACTCCCCGTCGTGTAGATAACTACGATACGGGAGGGCT  
TACCATCTGGCCCCAGTGCTGCAATGATACCGCGAGACCCACGCTACCCGGCTCCAGATTT  
ATCAGCAATAAACCAGCCAGCCGGAAGGGCCGAGCGCAGAAGTGGTCCTGCAACTTTATC  
CGCCTCCATCCAGTCTATTAATTGTTGCCGGGAAGCTAGAGTAAGTAGTTGCCAGTTAATA  
GTTTGCGCAACGTTGTTGCCATTGCTACAGGCATCGTGGTGTACGCTCGTCGTTTGGTATG  
GCTTCATTAGCTCCGGTTCCTAACGATCAAGGCGAGTTACATGATCCCCCATGTTGTGCA  
AAAAAGCGGTTAGCTCCTTCGGTCCCGATCGTTGTCAGAAGTAAGTTGGCCGCAGTGTT  
ATCACTCATGGTTATGGCAGCACTGCATAATTCTCTTACTGTCATGCCATCCGTAAGATGCT

TTTCTGTGACTGGTGAGTACTCAACCAAGTCATTCTGAGAATAGTGTATGCGGCGACCGAG  
TTGCTCTTGCCCGGCGTCAATACGGGATAATACCGCGCCACATAGCAGAACTTTAAAAGTG  
CTCATCATTGGAACCGTTCTTCGGGGCGAAACTCTCAAGGATCTTACCGCTGTTGAGAT  
CCAGTTCGATGTAACCCACTCGTGACCCAACTGATCTTCAGCATCTTTTACTTTACCAGC  
GTTTCTGGGTGAGCAAAACAGGAAGGCAAAATGCCGCAAAAAGGGAATAAGGGCGAC  
ACGGAATGTTGAATACTCATACTCTTCCTTTTTCAATCATGATTGAAGCATTTATCAGGGTT  
ATTGTCTCATGAGCGGATACATATTTGAATGTATTTAGAAAAATAAACAAATAGGTCATGAC  
CAAAATCCCTTAACGTGAGTTTTCGTTCCACTGAGCGTCAGACCCCGTAGAAAAGATCAAA  
GGATCTTCTTGAGATCCTTTTTTTCTGCGCGTAATCTGCTGCTTGCAAACAAAAAACACC  
GCTACCAGCGGTGGTTTGTGGCCGATCAAGAGCTACCAACTCTTTTCCGAAGGTAAGT  
GCTTCAGCAGAGCGCAGATACCAAATACTGTCCTTCTAGTGTAGCCGTAGTTAGGCCACCA  
CTTCAAGAACTCTGTAGCACCGCCTACATACCTCGCTCTGCTAATCCTGTTACCAGTGGCTG  
CTGCCAGTGGCGATAAGTCGTGCTTACCGGGTTGGAAGTCAAGACGATAGTTACCGGATAA  
GGCGCAGCGGTGCGGCTGAACGGGGGGTTCGTGCACACAGCCAGCTTGAGCGAACGA  
CCTACACCGAACTGAGATACCTACAGCGTGAGCTATGAGAAAGCGCCACGCTTCCCGAAG  
GGAGAAAGGCGGACAGGTATCCGGTAAGCGGCAGGGTCGGAACAGGAGAGCGCACGAG  
GGAGCTTCCAGGGGGAACGCCTGGTATCTTTATAGTCCTGTGCGGGTTTCGCCACCTCTGA  
CTTGAGCGTCGATTTTTGTGATGCTCGTCAGGGGGGCGGAGCCTATGGAACCGCCAGC  
AACGCGGCCTTTTTACGGTTCCTGGCCTTTTGCTGGCCTTTTGCTCACATGTTCTTTCCTGCG  
TTATCCCCTGATTCTGTGGATAACCGTATTACCGCCTTTGAGTGAGCTGATACCGCTCGCCG  
CAGCCGAACGACCGAGCGCAGCGAGTCAGTGAGCGAGGAAGCGGAAGAGCGCCTGATGC  
GGTATTTTCTCCTTACGCATCTGTGCGGTATTTACACCGCATATATGGTGCACTCTCAGTAC  
AATCTGCTCTGATGCCGCATAGTTAAGCCAGTATACACTCCGCTATCGCTACGTGACTGGGT  
CATGGCTGCGCCCCGACACCCGCCAACACCCGCTGACGCGCCCTGACGGGCTTGTCTGCT  
CCCGGCATCCGCTTACAGACAAGCTGTGACCGTCTCCGGGAGCTGCATGTGTCAGAGGTTT  
TCACCGTCATCACGAAACGCGCGAGGCAGCTGCGGTAAAGCTCATCAGCGTGGTCGTGA  
AGCGATTACAGATGTCTGCCTGTTTCATCCGCGTCCAGCTCGTTGAGTTTCTCCAGAAGCGT  
TAATGTCTGGCTTCTGATAAAGCGGGCCATGTTAAGGGCGGTTTTTCTGTTGGTCACTG  
ATGCCTCCGTGTAAGGGGGATTTCTGTTCATGGGGGTAATGATACCGATGAAACGAGAGAG  
GATGCTCACGATACGGGTACTGATGATGAACATGCCCGGTTACTGGAACGTTGTGAGGGT  
AAACAACTGGCGGTATGGATGCGGCGGGACCAGAGAAAAATCACTCAGGGTCAATGCCA  
GCGCTTCGTTAATACAGATGTAGGTGTTCCACAGGGTAGCCAGCAGCATCCTGCGATGCAG  
ATCCGGAACATAATGGTGCAGGGCGCTGACTTCCGCGTTTCCAGACTTTACGAAACACGGA  
AACCGAAGACCATTATGTTGTTGCTCAGGTCGCAGACGTTTTGCAGCAGCAGTCGCTTCA  
CGTTCGCTCGCGTATCGGTGATTCTGCTAACCAGTAAGGCAACCCCGCCAGCCTAGC  
CGGGTCTCAACGACAGGAGCACGATCATGCTAGTCATGCCCCGCGCCACCGGAAGGAG  
CTGACTGGGTGAAGGCTCTCAAGGGCATCGGTGAGATCCCGGTGCCTAATGAGTGAGC  
TAACTTACATTAATTGCGTTGCGCTCACTGCCCGCTTTCCAGTCGGGAAACCTGTCGTGCCA  
GCTGCATTAATGAATCGGCCAACGCGCGGGGAGAGGCGGTTTGCGTATTGGGCGCCAGGG  
TGGTTTTTCTTTTACCAGTGAGACGGGCAACAGCTGATTGCCCTTACCGCCTGGCCCTGA  
GAGAGTTGCAGCAAGCGGTCCACGCTGGTTTGCCCCAGCAGGCGAAAATCCTGTTTGATG  
GTGGTTAACGGCGGGATATAACATGAGCTGTCTTCGGTATCGTCGTATCCCACTACCGAGA  
TGTCGCGACCAACGCGCAGCCCGGACTCGGTAATGGCGCGCATTGCGCCCAGCGCCATCT  
GATCGTTGGCAACCAGCATCGCAGTGGGAACGATGCCCTCATTACGATTTGCATGGTTTG

TTGAAAACCGGACATGGCACTCCAGTCGCCTTCCCGTTCCGCTATCGGCTGAATTTGATTGC  
GAGTGAGATATTTATGCCAGCCAGCCAGACGCAGACGCGCCGAGACAGAACTTAATGGGC  
CCGCTAACAGCGCGATTTGCTGGTGACCCAATGCGACCAGATGCTCCACGCCCAGTCGCG  
TACCGTCTTCATGGGAGAAAATAATACTGTTGATGGGTGTCTGGTCAGAGACATCAAGAAA  
TAACGCCGGAACATTAGTGCAGGCAGCTTCCACAGCAATGGCATCCTGGTCATCCAGCGG  
ATAGTTAATGATCAGCCCACTGACGCGTTGCGCGAGAAGATTGTGCACCGCCGCTTTACAG  
GCTTCGACGCCGCTTCGTTCTACCATCGACACCACCACGCTGGCACCCAGTTGATCGGCGC  
GAGATTTAATCGCCGCGACAATTTGCGACGGCGCGTGCAGGGCCAGACTGGAGGTGGCAA  
CGCCAATCAGCAACGACTGTTTGCCCGCCAGTTGTTGTGCCACGCGGTTGGGAATGTAATT  
CAGCTCCGCCATCGCCGCTTCCACTTTTTCCCGCGTTTTTCGCAGAAACGTGGCTGGCCTGGT  
TCACCACGCGGGAAACGGTCTGATAAGAGACACCGGCATACTCTGCGACATCGTATAACG  
TACTGGTTTCACATTCACCACCCTGAATTGACTCTCTTCCGGGCGCTATCATGCCATACCG  
CGAAAGGTTTTGCGCCATTCGATGGTGTCCGGGATCTCGACGCTCTCCCTTATGCGACTCCT  
GCATTAGGAAGCAGCCCAGTAGTAGGTTGAGGCCGTTGAGCACCGCCGCCGCAAGGAATG  
GTGCATGCAAGGAGATGGCGCCCAACAGTCCCCCGGCCACGGGGCCTGCCACCATACCC  
ACGCCGAAACAAGCGCTCATGAGCCCGAAGTGGCGAGCCCGATCTTCCCCATCGGTGATG  
TCGGCGATATAGGCGCCAGCAACCGCACCTGTGGCGCCGGTGATGCCGGCCACGATGCGT  
CCGGCGTAGAGGATCGAGATCGATCTCGATCCCGCGAAATTAATACGACTCACTATA

#### Seq 4: pASPV4

GGGGAATTGTGAGCGGATAACAATTCCCCTCTAGAAATAATTTTGTTTAACTTTAAGAAGGAGAT  
ATACCATGCATCATCACCACCACCACCATTACATACCACTCCGTGGACCAATCCGGGTCT  
GGCGGAGAACTTCATGAACTCCTTTATGCAGGGCCTGAGCAGCATGCCGGGTTTCACCGCAAG  
CCAGCTGGACGACATGAGCACGATTGCGCAAAGCATGGTTCAGTCGATCCAGAGCTTGGCGGC  
CCAGGGTCGCACCTCCCCGAATAAGCTGCAGGCACTGAACATGGCGTTCGCCAGCTCCATGGC  
AGAGATCGCGGCGTCTGAAGAAGGTGGTGGTAGTTTGTCTACGAAAACCAGCTCTATCGCGTCT  
GCTATGAGCAACGCATTCCTGCAGACCACTGGTGTGGTGAACCAGCCATTTATCAATGAAATCA  
CCCAGCTCGTTAGCATGTTTGCACAAGCTGGCATGAATGATGTTAGCGCGGCTAGCTTGGGCTA  
CGGCCAGGGGGGGCTTCGGGGGCCGACGAGCGGGCGGCTGCTGCCGACGGTGGCCGTGGG  
GGGTATACGGCCGGGGCCGCGGGCTGGGCGGTGATTCTGCAGCCGCTGCGGCCGCTGCGGA  
TGGTGGGCGCGGGGGGTACGGTGGACGGGGCCTGGGTGGTGAATCTGGTGCCGCAGCTGCGG  
CTGCAGCCGCTGACGGTGGCCGCGGTGGCTATGGTGGTCGGGGTTTAGGGGGCGATAGTGCAG  
CGGCGGCTGCCGACGGCGGGCGGGCGGCTACTAGTGTACCAGCGGCGGCTACGGTTACGGC  
ACCTCCGCGGGCGGCTGGTGCGGGCGTGCAGCGGGTAGCTATGCCGGCGCGGTTAATCGTCTG  
AGCTCAGCGGAGGCAGCGTCTCGTGTTTCCTCCAACATCGCCGCGATTGCCTCGGGCGGCGCA  
AGCGCTTTACCGTCTGTTATTAGCAACATTTATAGCGGCGTCTGGCATCGGGCGTGAGCTCTA  
ACGAGGCCCTGATTCAGGCACTTTTGAAGTGTGTCTGCCTTGGTGCACGTGCTGAGCTCAGC  
TAGTATCGGTAACGTGAGCTCCGTGGGTGTCGACAGCACGCTGAATGTAGTTCAGGATTCCGTG  
GGCCAATATGTTGGTAAAAAGTAAGGACTCGTCTACTAGCGCAGCTTAATTAACCTAGGCTGCT  
GCCACCGCTGAGCAATAACTAGCATAACCCCTTGGGGCCTCTAAACGGGTCTTGAGGGGTTTTT  
TGCTGAAAGGAGGAACTATATCCGATTGGCGAATGGGACGCGCCCTGTAGCGGCGCATTAAAG  
CGCGGCGGGTGTGGTGGTTACGCGCAGCGTGACCGCTACACTTGCCAGCGCCCTAGCGCCCCG  
TCCTTTCGCTTTCCTTCCCTTCTCGCCACGTTCCGGGCTTCCCCGTCAAGCTCTAAATCG  
GGGGCTCCCTTAGGGTCCGATTTAGTGCTTTACGGCACCTCGACCCCAAAAACTTGATTAG  
GGTGATGGTTCACGTAGTGGGCCATCGCCCTGATAGACGGTTTTTCGCCCTTTGACGTTGGAGT  
CCACGTTCTTAATAGTGGACTCTTGTTCCAACTGGAACAACACTCAACCCTATCTCGGTCTAT  
TCTTTTGATTTATAAGGGATTTTGCCGATTTGGCCTATTGGTTAAAAAATGAGCTGATTTAACAA  
AAATTTAACGCGAATTTTAACAAAATATTAACGTTTACAATTTCTGGCGGCACGATGGCATGAGA  
TTATCAAAAAGGATCTTCACCTAGATCCTTTTAAATTAATAAATGAAGTTTTAAATCAATCTAAAGT  
ATATATGAGTAACTTGGTCTGACAGTTACCAATGCTTAATCAGTGAGGCACCTATCTCAGCGAT  
CTGTCTATTTCTTCATCCATAGTTGCCTGACTCCCCGTCTGTAGATAACTACGATACGGGAGG  
GCTTACCATCTGGCCCCAGTGCTGCAATGATACCGCGAGACCCACGCTCACCGGCTCCAGATTT  
ATCAGCAATAAACAGCCAGCCGGAAGGGCCGAGCGCAGAAGTGGTCCTGCAACTTTATCCGC  
CTCCATCCAGTCTATTAATTGTTGCCGGAAGCTAGAGTAAGTAGTTTCGCCAGTTAATAGTTTGC  
GCAACGTTGTTGCCATTGCTACAGGCATCGTGGTGTACGCTCGTCGTTTGGTATGGCTTCATTC  
AGCTCCGGTCCCAACGATCAAGGCGAGTTACATGATCCCCATGTTGTGCAAAAAAGCGGTTA  
GCTCCTTCGGTCTCCGATCGTTGTCAGAAGTAAGTTGGCCGCAGTGTTATCACTCATGGTTATG  
GCAGCACTGCATAATTCTCTTACTGTCATGCCATCCGTAAGATGCTTTTCTGTGACTGGTGAGTA  
CTCAACCAAGTCATTCTGAGAATAGTGTATGCGGCGACCGAGTTGCTCTTGCCCGGCGTCAATA  
CGGGATAATACCGCGCCACATAGCAGAACTTTAAAGTGCTCATCATTGGAAAACGTTCTTCGG  
GGCGAAAACCTCTCAAGGATCTTACCGCTGTTGAGATCCAGTTCGATGTAACCCACTCGTGCACC  
CAACTGATCTTCAGCATCTTTTACTTTACCCAGCGTTTCTGGGTGAGCAAAAACAGGAAGGCAA  
AATGCCGCAAAAAAGGGAATAAGGGCGACACGGAAATGTTGAATACTCATACTCTTCTTTTTTC

AATCATGATTGAAGCATTTATCAGGGTTATTGTCTCATGAGCGGATACATATTTGAATGTATTTAG  
AAAAATAAACAAATAGGTCATGACCAAAATCCCTTAACGTGAGTTTTCTGTTCCACTGAGCGTCA  
GACCCCGTAGAAAAGATCAAAGGATCTTCTTGAGATCCTTTTTTCTGCGCGTAATCTGCTGCTT  
GCAAACAAAAAAACCACCGCTACCAGCGGTGGTTTGTGGCCGGATCAAGAGCTACCAACTCTT  
TTCCGAAGGTAAGTGGCTTCAGCAGAGCGCAGATACCAAATACTGTCTTCTAGTGTAGCCGT  
AGTTAGGCCACCACTTCAAGAACTCTGTAGCACCGCCTACATACCTCGCTCTGCTAATCCTGTTA  
CCAGTGGCTGCTGCCAGTGGCGATAAGTCGTGTCTTACCGGGTTGGACTCAAGACGATAGTTAC  
CGGATAAGGCGCAGCGGTGCGGGCTGAACGGGGGGTTCGTGCACACAGCCCAGCTTGGAGCGA  
ACGACCTACACCGAACTGAGATACCTACAGCGTGAGCTATGAGAAAGCGCCACGCTTCCCGAA  
GGGAGAAAGGCGGACAGGTATCCGGTAAGCGGCAGGGTCGGAACAGGAGAGCGCACGAGGG  
AGCTTCCAGGGGGAAACGCCTGGTATCTTTATAGTCCTGTGCGGGTTTCGCCACCTCTGACTTGA  
GCGTCGATTTTTGTGATGCTCGTCAGGGGGGCGGAGCCTATGGAAAAACGCCAGCAACGCGGC  
CTTTTACGGTTCTTGGCCTTTTGTGCGCTTTTGTCTACATGTTCTTTCCTGCGTTATCCCCTGAT  
TCTGTGGATAACCGTATTACCGCCTTTGAGTGAGCTGATACCGCTCGCCGCAGCCGAACGACCG  
AGCGCAGCGAGTCAGTGAGCGAGGAAGCGGAAGAGCGCCTGATGCGGTATTTTCTCCTTACGC  
ATCTGTGCGGTATTTACACCGCATATATGGTGCACTCTCAGTACAATCTGCTCTGATGCCGCAT  
AGTTAAGCCAGTATACACTCCGCTATCGCTACGTGACTGGGTCATGGCTGCGCCCCGACACCCG  
CCAACACCCGCTGACGCGCCCTGACGGGCTTGTCTGCTCCCGGCATCCGCTTACAGACAAGCT  
GTGACCGTCTCCGGGAGCTGCATGTGTGTCAGAGGTTTTACCGTCATCACCGAAACGCGCGAGG  
CAGCTGCGGTAAAGCTCATCAGCGTGGTCGTGAAGCGATTACAGATGTCTGCCTGTTTCATCCG  
CGTCCAGCTCGTTGAGTTTCTCCAGAAGCGTTAATGTCTGGCTTCTGATAAAGCGGGCCATGTTA  
AGGGCGGTTTTTCTGTTTGGTCACTGATGCCTCCGTGTAAGGGGGATTCTGTTCATGGGGGT  
AATGATACCGATGAAACGAGAGAGGATGCTCACGATACGGGTACTGATGATGAACATGCCCG  
GTTACTGGAACGTTGTGAGGGTAAACAACCTGGCGGTATGGATGCGGCGGGACCAGAGAAAAAT  
CACTCAGGGTCAATGCCAGCGCTTCGTTAATACAGATGTAGGTGTTCCACAGGGTAGCCAGCAG  
CATCCTGCGATGCAGATCCGGAACATAATGGTGACGGGCGCTGACTTCCGCGTTTCCAGACTTT  
ACGAAACACGGAAACCGAAGACCATTGTTGTTGCTCAGGTCGCAGACGTTTTGCAGCAGC  
AGTCGCTTCACGTTGCTCGCGTATCGGTGATTCTGCTAACCAGTAAGGCAACCCCGCCA  
GCCTAGCCGGGTCCTCAACGACAGGAGCACGATCATGCTAGTCATGCCCCGCGCCACCGGAA  
GGAGCTGACTGGGTGAAGGCTCTCAAGGGCATCGGTGAGATCCCGGTGCCTAATGAGTGAG  
CTAACTTACATTAATTGCGTTGCGCTCACTGCCCGCTTTCAGTCGGGAAACCTGTCGTGCCAGC  
TGCATTAATGAATCGGCCAACGCGCGGGGAGAGGCGGTTTTCGTATTGGGCGCCAGGGTGGTT  
TTTCTTTTACCAAGTGAGACGGGCAACAGCTGATTGCCCTTACCGCCTGGCCCTGAGAGAGTT  
GCAGCAAGCGGTCCACGCTGGTTTGGCCAGCAGGCGAAAAATCCTGTTTGATGGTGTTAACG  
GCGGGATATAACATGAGCTGTCTTCGGTATCGTCGTATCCCACTACCGAGATGTCCGCACCAAC  
GCGCAGCCCGGACTCGGTAATGGCGCGCATTGCGCCAGCGCCATCTGATCGTTGGCAACCAG  
CATCGCAGTGGGAACGATGCCCTCATTACGATTTGCATGGTTTGTGAAAACCGGACATGGCA  
CTCCAGTCGCCTTCCGTTCCGCTATCGGCTGAATTTGATTGCGAGTGAGATATTTATGCCAGCC  
AGCCAGACGCAGACGCGCCGAGACAGAACTTAATGGGCCCCGCTAACAGCGCGATTTGCTGGTG  
ACCCAATGCGACCAGATGCTCCACGCCCAGTCGCGTACCGTCTTCATGGGAGAAAAATAACTG  
TTGATGGGTGTCTGGTCAGAGACATCAAGAAATAACGCCGGAACATTAGTGACGGCAGCTTCC  
ACAGCAATGGCATCCTGGTCATCCAGCGGATAGTTAATGATCAGCCCACTGACGCGTTGCGCG  
AGAAGATTGTGCACCGCCGCTTTACAGGCTTCGACGCGCTTCGTTCTACCATCGACACCACCA  
CGCTGGCACCCAGTTGATCGGCGCGAGATTTAATCGCCGCGACAATTTGCGACGGCGCGTGCA

GGGCCAGACTGGAGGTGGCAACGCCAATCAGCAACGACTGTTTGCCCGCCAGTTGTTGTGCCA  
CGCGGTTGGGAATGTAATTCAGCTCCGCCATCGCCGCTTCCACTTTTTCCCGCGTTTTTCGCAGAA  
ACGTGGCTGGCCTGGTTCACCAACGCGGGAACGGTCTGATAAGAGACACCGGCATACTCTGCG  
ACATCGTATAACGTTACTGGTTTCACATTCACCACCCTGAATTGACTCTCTTCCGGGCGCTATCA  
TGCCATACCGCGAAAGGTTTTGCGCCATTCGATGGTGTCCGGGATCTCGACGCTCTCCCTTATG  
CGACTCCTGCATTAGGAAGCAGCCCAGTAGTAGGTTGAGGCCGTTGAGCACCGCCGCCGCAAG  
GAATGGTGCATGCAAGGAGATGGCGCCCAACAGTCCCCCGCCACGGGGCCTGCCACCATAC  
CCACGCCGAAACAAGCGCTCATGAGCCCGAAGTGGCGAGCCCGATCTTCCCCATCGGTGATGT  
CGGCGATATAGGCGCCAGCAACCGCACCTGTGGCGCCGGTGATGCCGGCCACGATGCGTCCG  
GCGTAGAGGATCGAGATCGATCTCGATCCCGCGAAATTAATACGACTCACTATA
